# Supplementary material for: Causal Attributions of Happiness and Critical Events
Source: Atypon-hosted journal article supplement (doi:10.1027/1864-9335/a000484), 2022-08-02
Supplement: 1864-9335_a000484_esm1.pdf [file 1864-9335_a000484_esm1.pdf]

Table E1.  
Events and classification.

| Category        | Event                                                                  | Proportion |
|-----------------|------------------------------------------------------------------------|------------|
| Positive events |                                                                        |            |
|                 | Getting married, finding a partner<br>o5 falling in love               | 0.08       |
|                 | Attending a children or<br>grandchildren's graduation                  | 0.12       |
|                 | Birth of a child                                                       | 0.04       |
|                 | Promotion or income increase                                           | 0.05       |
|                 | Buying a house                                                         | 0.03       |
| Negative events |                                                                        |            |
|                 | Severe illness of a love one or<br>important person                    | 0.15       |
|                 | Ending of an important<br>relationship (divorce or break up)           | 0.07       |
|                 | Death of a love one or important<br>person                             | 0.08       |
|                 | Decrease on income                                                     | 0.15       |
|                 | Cut off of basic services due to<br>unpaid bills                       | 0.08       |
|                 | Employment loss of household<br>head                                   | 0.07       |
|                 | Damage because of an<br>earthquake, fire or flood                      | 0.03       |
|                 | Drop out because of financial<br>reasons                               | 0.03       |
|                 | Psychiatric illness (depression,<br>bipolarity, eating disorder, etc.) | 0.08       |
|                 | Not having access to medical care<br>or medicines                      | 0.08       |
|                 | Drug addiction or alcoholism                                           | 0.02       |

Table E2.  
Cross-level interactions with positive events.

| VARIABLES                                           | (1)<br>B                 |
|-----------------------------------------------------|--------------------------|
| Female                                              | 0.052*<br>(0.025)        |
| Age                                                 | 0.034***<br>(0.007)      |
| Partner status (Ref. Cat.: With couple for 5 years) |                          |
| Without partner for 5 years                         | -0.083*<br>(0.041)       |
| Without partner for 1 year                          | 0.110**<br>(0.040)       |
| Recent break up                                     | -0.100*<br>(0.041)       |
| With partner for 1 year                             | 0.074<br>(0.038)         |
| Family relationships                                | 0.133***<br>(0.013)      |
| Income                                              | 0.141***<br>(0.007)      |
| Health                                              | 0.437***<br>(0.016)      |
| Lifestyle (Ref. Cat.: Exciting)                     |                          |
| Quiet                                               | -0.020<br>(0.037)        |
| Boring                                              | -<br>0.491***<br>(0.040) |
| Stressful                                           | -<br>0.625***<br>(0.038) |
| Intergenerational comparison                        | 0.088***<br>(0.010)      |
| Positive Events Index                               | -0.091<br>(0.156)        |
| Negative Events Index                               | 0.063<br>(0.049)         |
| Female # Positive Events Index                      | 0.049<br>(0.041)         |
| Age # Positive Events Index                         | -0.012<br>(0.013)        |
| Without partner for 5 years # Positive Events Index | 0.030<br>(0.071)         |
| Without partner for 1 year # Positive Events Index  | -0.028<br>(0.062)        |
| Recent break up # Positive Events Index             | 0.040<br>(0.062)         |
| With partner for 1 year # Positive Events Index     | 0.088<br>(0.060)         |
| Family relationships # Positive Events Index        | 0.056*<br>(0.022)        |
| Income # Positive Events Index                      | -0.012<br>(0.012)        |
| Health # Positive Events Index                      | -0.018                   |

|                                                      |                     |
|------------------------------------------------------|---------------------|
| Quiet # Positive Events Index                        | (0.026)<br>0.117    |
| Boring # Positive Events Index                       | (0.060)<br>0.078    |
| Stressful # Positive Events Index                    | (0.068)<br>0.159*   |
| Intergenerational comparison # Positive Events Index | (0.067)<br>-0.007   |
| SWLS                                                 | (0.019)<br>0.009*   |
| Declared happiness (Ref. Cat.: Very happy)           | (0.004)             |
| Quite happy                                          | 0.057<br>(0.057)    |
| Not very happy                                       | 0.063<br>(0.081)    |
| Not happy                                            | -0.143<br>(0.145)   |
| Constant                                             | 2.721***<br>(0.155) |
| Observations                                         | 25,771              |
| Number of groups                                     | 2,164               |

---

Note: Robust standard errors in parentheses. Entropy balance included. \*\*\* p<0.001, \*\* p<0.01, \* p<0.05.

Table E3.  
Cross-level interactions with negative events.

| VARIABLES                                           | (1)<br>B             |
|-----------------------------------------------------|----------------------|
| Female                                              | 0.088**<br>(0.028)   |
| Age                                                 | 0.032***<br>(0.008)  |
| Partner status (Ref. Cat.: With couple for 5 years) |                      |
| Without partner for 5 years                         | -0.057<br>(0.046)    |
| Without partner for 1 year                          | 0.123**<br>(0.044)   |
| Recent break up                                     | -0.082<br>(0.044)    |
| With partner for 1 year                             | 0.108**<br>(0.041)   |
| Family relationships                                | 0.125***<br>(0.014)  |
| Income                                              | 0.130***<br>(0.008)  |
| Health                                              | 0.412***<br>(0.017)  |
| Lifestyle (Ref. Cat.: Exciting)                     |                      |
| Quiet                                               | 0.008<br>(0.041)     |
| Boring                                              | -0.451***<br>(0.045) |
| Stressful                                           | -0.594***<br>(0.042) |
| Intergenerational comparison                        | 0.078***<br>(0.011)  |
| Negative Events Index                               | 0.009<br>(0.044)     |
| Positive Events Index                               | -0.251<br>(0.151)    |
| Female # Negative Events Index                      | -0.037<br>(0.044)    |
| Age # Negative Events Index                         | -0.008<br>(0.013)    |
| Without partner for 5 years # Negative Events Index | -0.050<br>(0.070)    |
| Without partner for 1 year # Negative Events Index  | -0.046<br>(0.064)    |
| Recent break up # Negative Events Index             | -0.034<br>(0.069)    |
| With partner for 1 year # Negative Events Index     | -0.035<br>(0.063)    |
| Family relationships # Negative Events Index        | 0.057**<br>(0.022)   |
| Income # Negative Events Index                      | 0.014<br>(0.012)     |
| Health # Negative Events Index                      | 0.037                |

|                                                      |                     |
|------------------------------------------------------|---------------------|
| Quiet # Negative Events Index                        | (0.027)<br>0.004    |
| Boring # Negative Events Index                       | (0.061)<br>-0.018   |
| Stressful # Negative Events Index                    | (0.067)<br>0.047    |
| Intergenerational comparison # Negative Events Index | (0.065)<br>0.019    |
| SWLS                                                 | (0.017)<br>0.010*   |
| Declared happiness (Ref. Cat.: Very happy)           | (0.004)             |
| Quite happy                                          | 0.015<br>(0.056)    |
| Not very happy                                       | 0.048<br>(0.080)    |
| Not happy                                            | -0.164<br>(0.146)   |
| Constant                                             | 2.847***<br>(0.159) |
| Observations                                         | 25,771              |
| Number of groups                                     | 2,164               |

---

Note: Robust standard errors in parentheses; \*\*\* p<0.001, \*\* p<0.01, \* p<0.05.
